# Supplementary material
Source: Springer Nature journal article supplement (https://www.springermedizin.de/resource/supplementary/12936_2008_651_MOESM3_ESM.pdf/9547918)

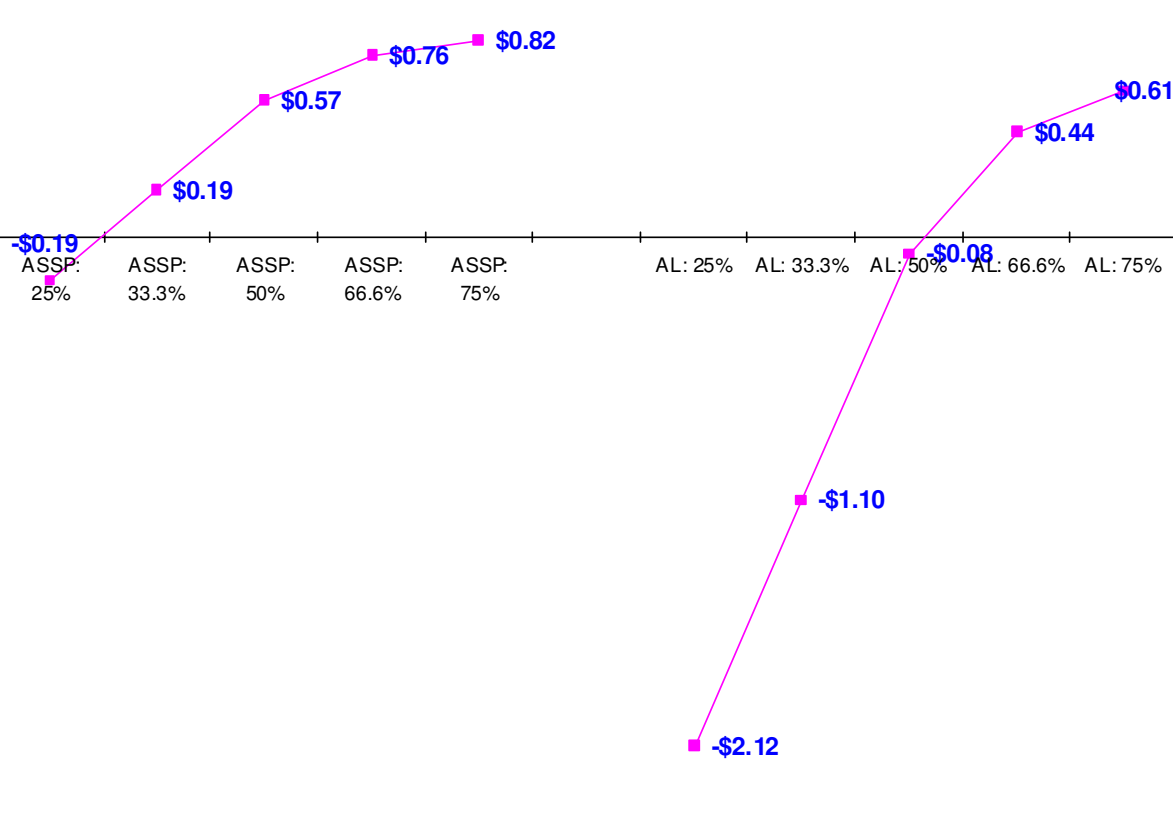

Note: The negative values show cost savings, while the positive values show additional costs.

Supplement: MOESM3 [file 9547918]
